# Supplementary material
Source: publisher site journal article supplement (https://www.dovepress.com/article/614524)
Supplement: Supplementary file 1 [file 614524%20Revised%20Supplementary%20Material.doc]

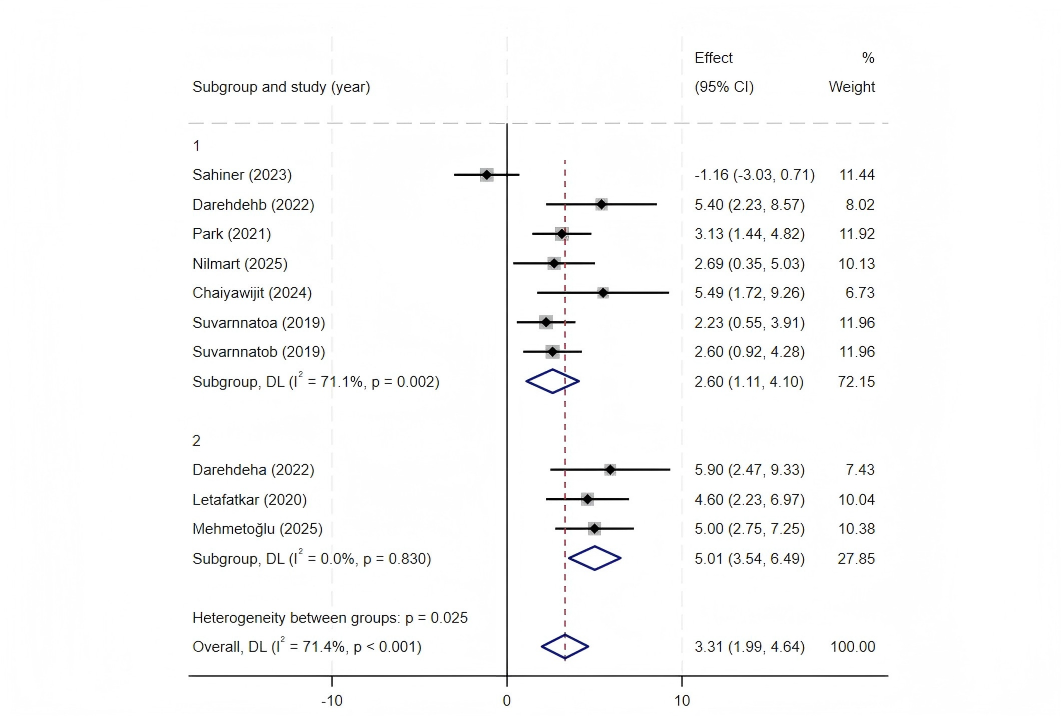


Note: Weights and between subgroup heterogeneity test are from random-effects model

**Supplementary Figure S1** CVA by intervention type


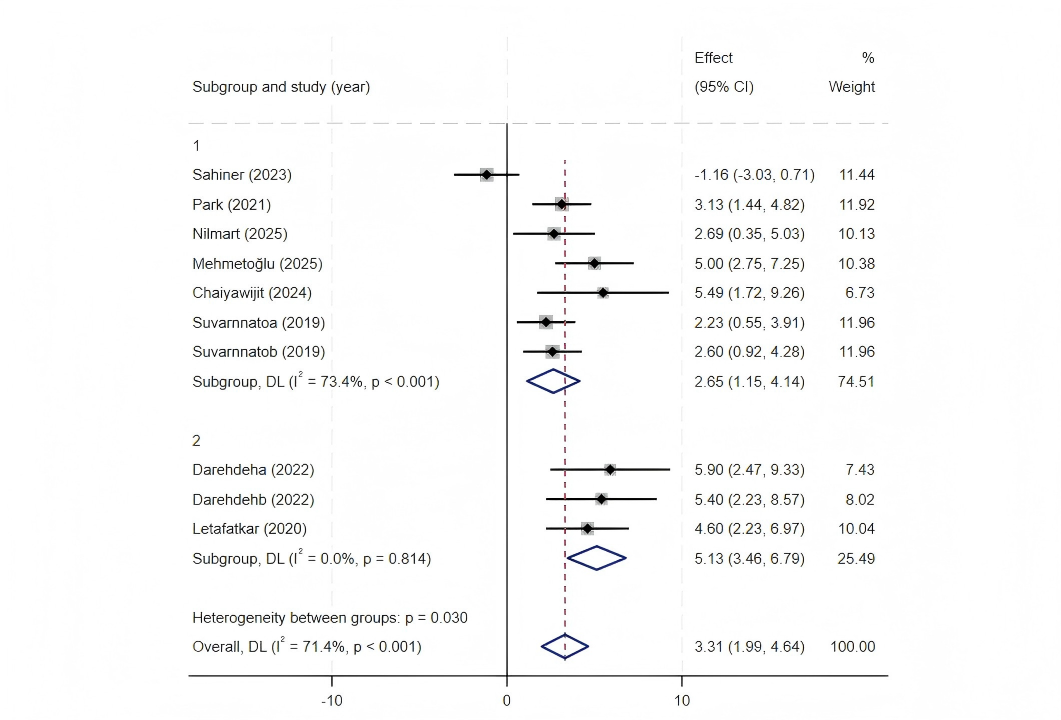


Note: Weights and between subgroup heterogeneity test are from random-effects model

**Supplementary Figure S2** CVA by intervention duration


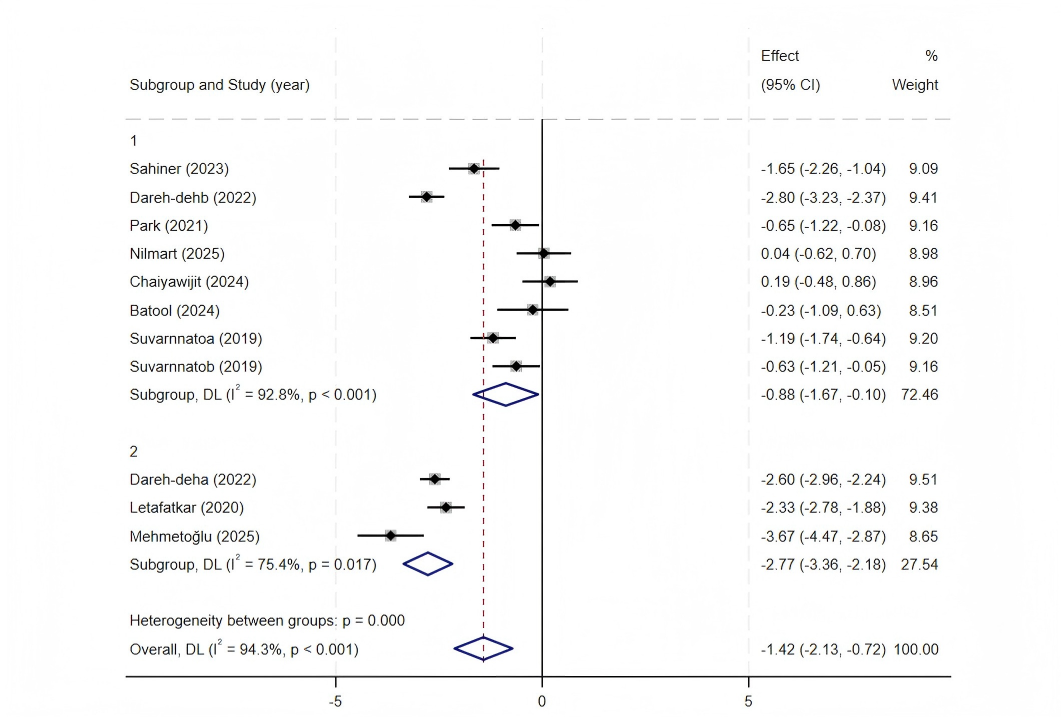


Note: Weights and between subgroup heterogeneity test are from random-effects model

**Supplementary Figure S3** VAS by intervention type


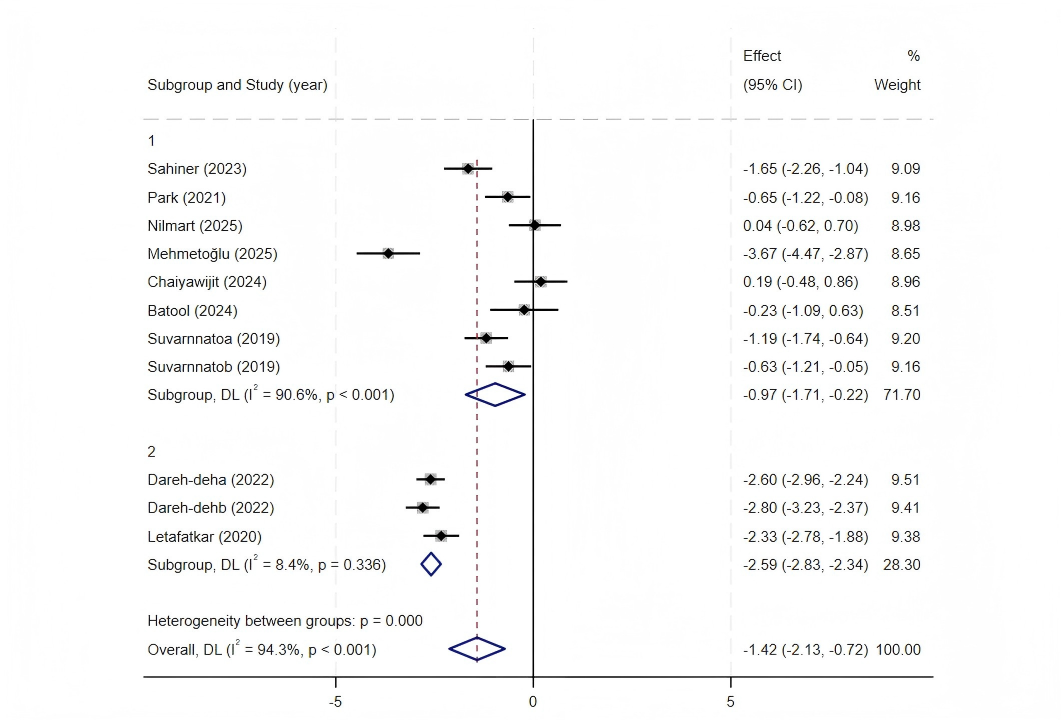


Note: Weights and between subgroup heterogeneity test are from random-effects model

**Supplementary Figure S4** VAS by intervention duration


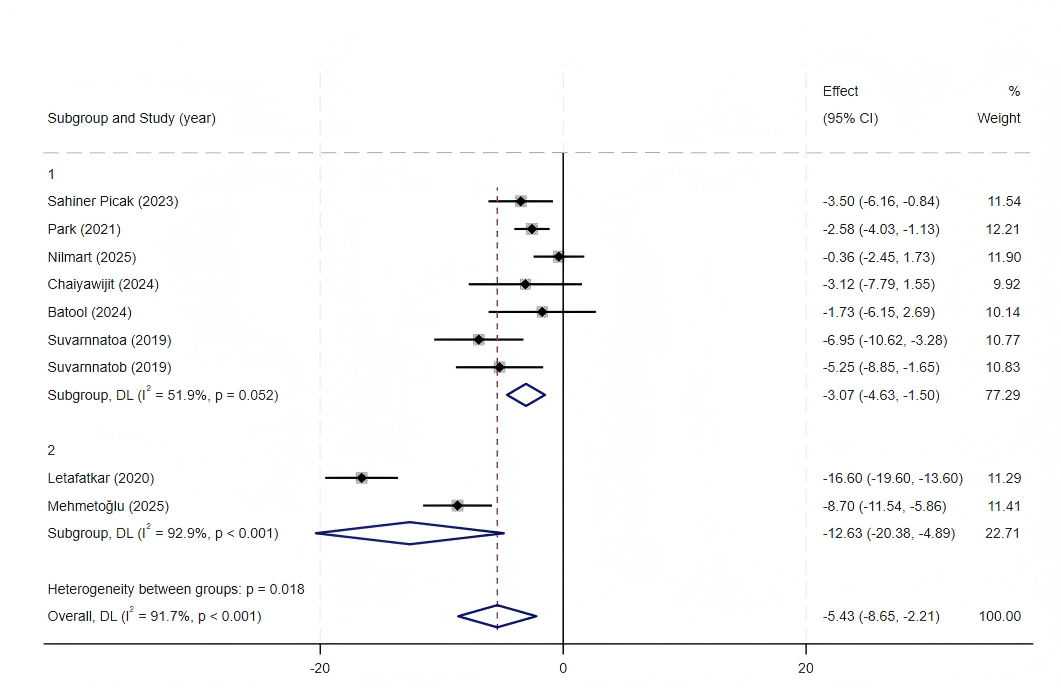


Note: Weights and between subgroup heterogeneity test are from random-effects model

**Supplementary Figure S5** NDI by intervention type


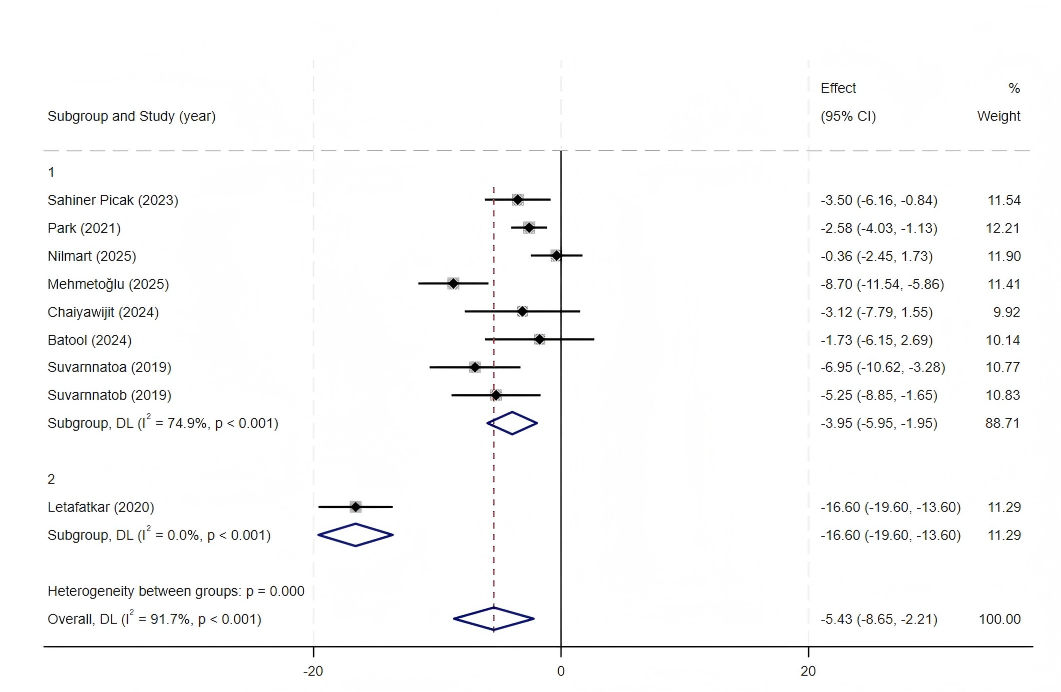


Note: Weights and between subgroup heterogeneity test are from random-effects model

**Supplementary Figure S6** NDI by intervention duration


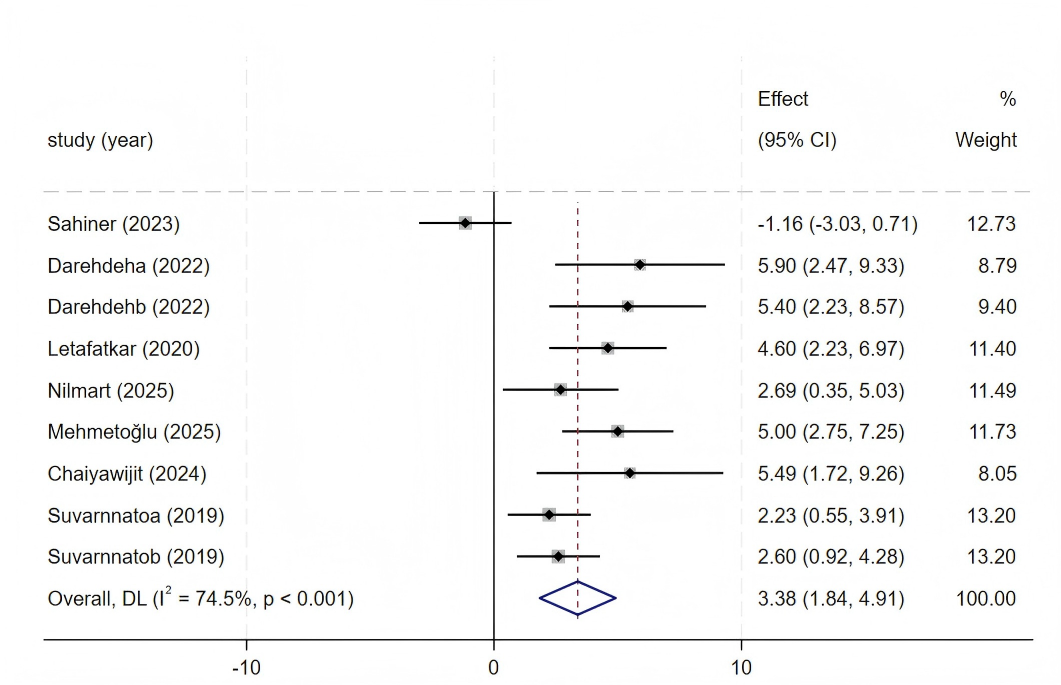


NOTE：Weights are from random effects model

**Supplementary Figure S7** Forest plot of sensitivity analysis for CVA after excluding low-quality studies (PEDro score <6)


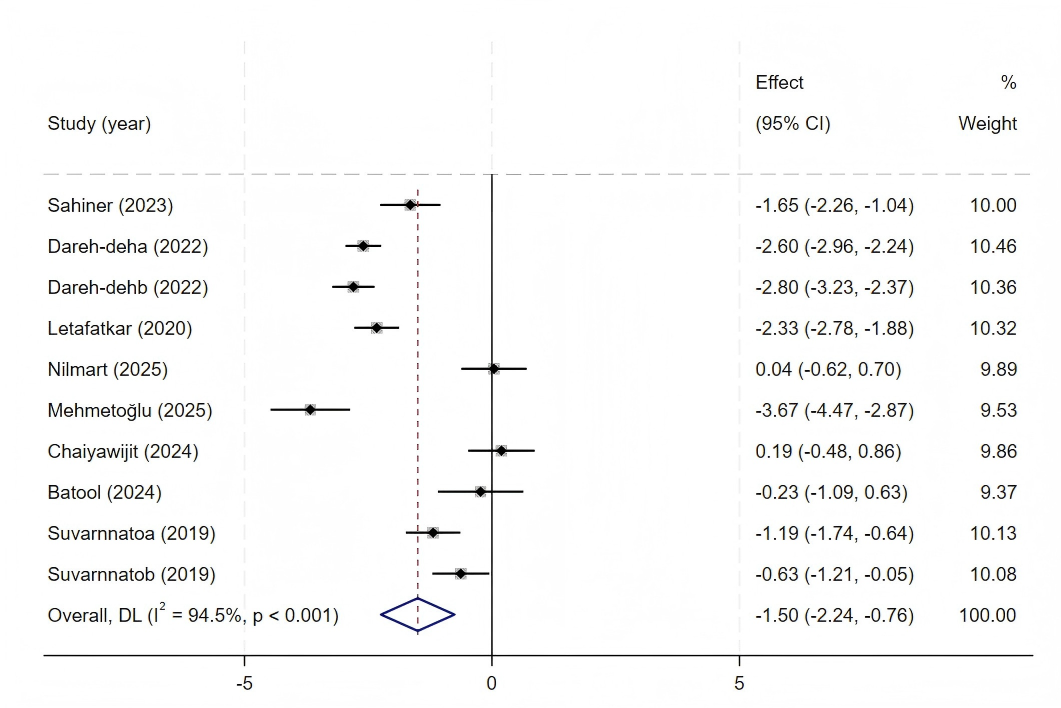


NOTE：Weights are from random effects model

**Supplementary Figure S8** Forest plot of sensitivity analysis for VAS after excluding low-quality studies (PEDro score <6)


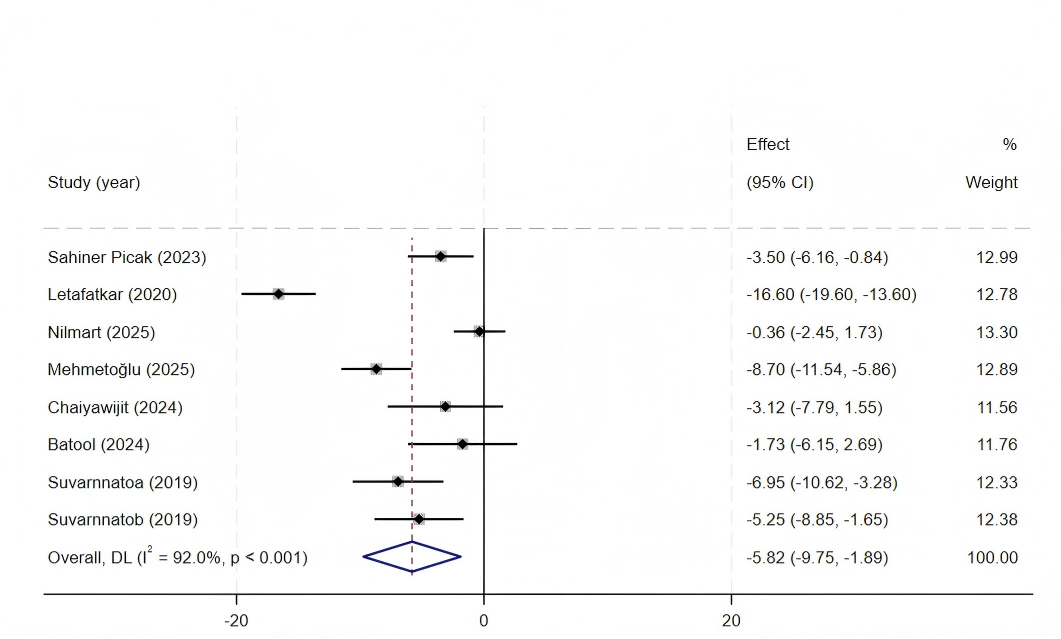


NOTE：Weights are from random effects model

**Supplementary Figure S9** Forest plot of sensitivity analysis for NDI after excluding low-quality studies (PEDro score <6)

**Supplementary Table S1** Search strategy for electronic databases

| **Database** | **Search Strategy** | **Initial Hits** |
| --- | --- | --- |
| **Web of Science (WOS)** | ( TS=("forward head" OR "head posture" OR "anterior head" OR "head protraction" OR "craniovertebral" OR "cervical posture" OR "poor posture") AND TS=("neck pain" OR "cervical pain" OR "neck disability" OR "neck ache" OR "cervical disorder*" OR "cervical dysfunction*" OR "neck problem*") AND TS=(exercise* OR rehabilitation OR training OR "physical therap*" OR "therapeutic exercise" OR strength* OR stretch* OR "motor control" OR "stabilization" OR "scapular" OR "postural training" OR "resistance training") ) | 336 |
| **PubMed** | ( ("Posture"[Mesh] OR "Head"[Mesh] OR "Cervical Vertebrae"[Mesh] OR "forward head posture"[tiab] OR "forward head position"[tiab] OR "anterior head carriage"[tiab] OR "head protraction"[tiab] OR "craniovertebral angle"[tiab] OR "CVA"[tiab] OR "cervical posture"[tiab] OR "poor posture"[tiab]) AND ("Neck Pain"[Mesh] OR "Neck"[Mesh] OR "neck pain"[tiab] OR "cervical pain"[tiab] OR "cervicalgia"[tiab] OR "neck disability"[tiab] OR "neck ache"[tiab] OR "cervicodynia"[tiab]) AND ("Exercise Therapy"[Mesh:Exp] OR "Rehabilitation"[Mesh] OR "Resistance Training"[Mesh] OR "Exercise"[Mesh] OR "Physical Therapy Modalities"[Mesh] OR exercise*[tiab] OR "therapeutic exercise"[tiab] OR rehabilitat*[tiab] OR train*[tiab] OR strength*[tiab] OR stretch*[tiab] OR "scapular stabiliz*"[tiab] OR "motor control"[tiab] OR "stabilization exercise"[tiab] OR "scapulothoracic"[tiab]) ) | 345 |
| **Medline** | ( ("Posture"[Mesh] OR "Head"[Mesh] OR "Cervical Vertebrae"[Mesh] OR "forward head posture"[tiab] OR "forward head position"[tiab] OR "anterior head carriage"[tiab] OR "head protraction"[tiab] OR "craniovertebral angle"[tiab] OR "CVA"[tiab] OR "cervical posture"[tiab] OR "poor posture"[tiab]) AND ("Neck Pain"[Mesh] OR "Neck"[Mesh] OR "cervical pain"[tiab] OR "cervicalgia"[tiab] OR "neck disability"[tiab] OR "neck ache"[tiab] OR "cervicodynia"[tiab]) AND ("Exercise Therapy"[Mesh:Exp] OR "Rehabilitation"[Mesh] OR "Resistance Training"[Mesh] OR "Exercise"[Mesh] OR "Physical Therapy Modalities"[Mesh] OR exercise*[tiab] OR "therapeutic exercise"[tiab] OR rehabilitat*[tiab] OR train*[tiab] OR strength*[tiab] OR stretch*[tiab] OR "scapular stabiliz*"[tiab] OR "motor control"[tiab] OR "stabilization exercise"[tiab] OR "scapulothoracic"[tiab]) ) | 1,529 |
| **Cochrane Central** | **#1:** (forward head posture OR forward head position OR anterior head carriage OR head protraction OR craniovertebral angle OR CVA OR cervical posture OR poor posture OR head posture OR cervical vertebrae)  **#2:** (neck pain OR cervical pain OR cervicalgia OR neck disability OR neck ache OR cervicodynia)  **#3:** (exercise OR exercises OR exercising OR therapeutic exercise OR rehabilitation OR rehabilitative OR training OR strength OR strengthening OR stretch OR stretching OR scapular stabilization OR scapular stabilisation OR motor control OR stabilization exercise OR scapulothoracic)  **#4:** #1 AND #2 AND #3  *Search date: March 15, 2026* | 1,156 |
| **Embase** | **#1:** Posture/head/cervical spine terms AND RCT filter AND 1967-2025  **#2:** Neck pain terms AND RCT filter AND 1967-2025  **#3:** Exercise/rehabilitation terms AND RCT filter AND 1967-2025  **#4:** #1 AND #2 AND #3  *Search date: March 15, 2026* | 896 |
| **Scopus** | ( TITLE-ABS-KEY ( "posture" OR "head" OR "cervical vertebrae" OR "cervical spine" OR "forward head posture" OR "forward head position" OR "anterior head carriage" OR "head protraction" OR "craniovertebral angle" OR "CVA" OR "cervical posture" OR "poor posture" ) AND TITLE-ABS-KEY ( "neck pain" OR "cervical pain" OR "cervicalgia" OR "neck disability" OR "neck ache" OR "cervicodynia" ) AND TITLE-ABS-KEY ( "exercise therapy" OR "therapeutic exercise" OR "kinesiotherapy" OR "rehabilitation" OR "resistance training" OR "exercise" OR "physical therapy" OR "physiotherapy" OR exercis* OR rehabilitat* OR train* OR strength* OR stretch* OR "scapular stabiliz*" OR "motor control" OR "stabilization exercise" OR "scapulothoracic" ) ) AND PUBYEAR > 1963 AND PUBYEAR < 2026 AND language filters | 2,456 |
| **Total (before deduplication)** |  | **6,718** |

**Supplementary Table S2** Risk of Bias Assessment Methodology

| **Assessment Tool** | **Domain / Item** | **Description** | **Rating Criteria** |
| --- | --- | --- | --- |
| **Cochrane Risk of Bias 2.0 (RoB 2.0)** | **Domain 1** | Bias arising from the randomization process  (includes sequence generation and allocation concealment) | • Low risk  • Some concerns  • High risk |
|  | **Domain 2** | Bias due to deviations from intended interventions  (covers blinding of participants and personnel) | • Low risk  • Some concerns  • High risk |
|  | **Domain 3** | Bias due to missing outcome data | • Low risk  • Some concerns  • High risk |
|  | **Domain 4** | Bias in outcome measurement  (includes blinding of outcome assessors) | • Low risk  • Some concerns  • High risk |
|  | **Domain 5** | Bias in selection of the reported result | • Low risk  • Some concerns  • High risk |
|  | **Additional considerations** | Baseline imbalance, insufficient sample size calculation | Assessed qualitatively |
| **PEDro Scale** | 10-item scale specifically validated for physical therapy and rehabilitation RCTs | Items: random allocation, concealed allocation, baseline comparability, blinding, follow-up, intention-to-treat analysis, between-group comparisons, point estimates and variability | • Score 0-10  • ≥6 = High quality  • <6 = Low quality |

**Supplementary Table S3** Meta-regression analysis of intervention duration and exercise modality on treatment effects

| **Outcome** | **Covariate** | **Coefficient (β)** | Std. Err. | **95% Confidence Interval** | P value | Model Summary |
| --- | --- | --- | --- | --- | --- | --- |
| CVA  (n=10 studies) | Intercept | -0.944 | 2.056 | (-5.810, 3.921) | 0.660 | Adj R²=34.28%  Model F=2.27  Model P=0.174  Residual I²=63.79% |
|  | Intervention duration (≥8 weeks vs. <8 weeks) | 1.686 | 1.651 | (-2.218, 5.591) | 0.341 |  |
|  | Exercise modality (Combined vs. Single) | 1.648 | 1.593 | (-2.118, 5.415) | 0.335 |  |
| NDI  (n=9 studies) | Intercept | 10.413 | 2.751 | (3.681, 17.145) | 0.009 | Adj R²=89.08%  Model F=18.10  Model P=0.0029**  Residual I²=51.95% |
|  | Intervention duration (≥8 weeks vs. <8 weeks) | -7.900 | 3.055 | (-15.376, -0.424) | 0.041* |  |
|  | Exercise modality (Combined vs. Single) | -5.607 | 2.288 | (-11.204, -0.009) | 0.050* |  |
| VAS  (n=11 studies) | Intercept | 1.498 | 0.954 | (-0.701, 3.698) | 0.155 | Adj R²=49.26%  Model F=5.29  Model P=0.034*  Residual I²=88.43% |
|  | Intervention duration (≥8 weeks vs. <8 weeks) | -0.796 | 0.749 | (-2.524, 0.932) | 0.319 |  |
|  | Exercise modality (Combined vs. Single) | -1.489 | 0.759 | (-3.239, 0.262) | 0.086 |  |

Note: * P < 0.05; ** P < 0.01.A negative β coefficient indicates greater improvement in the intervention group.

**Supplementary Table S4** Sensitivity analysis results before and after excluding low-quality studies (PEDro<6)

| **Outcome** | **Analysis Type** | **Pooled MD (95% CI)** | **P value** | **I² for Heterogeneity** |
| --- | --- | --- | --- | --- |
| CVA | Primary analysis | 3.31° (1.99° to 4.64°) | <0.001 | 71.4% |
|  | After excluding low-quality studies | 3.38° (1.84° to 4.91°) | <0.001 | 74.5% |
| NDI | Primary analysis | -5.43 (-8.65 to -2.21) | <0.001 | 91.7% |
|  | After excluding low-quality studies | -5.22 (-9.75 to -1.89) | <0.001 | 92.0% |
| VAS | Primary analysis | -1.42 (-2.13 to -0.72) | <0.001 | 94.3% |
|  | After excluding low-quality studies | -1.50 (-2.24 to -0.76) | <0.001 | 94.5% |

**Note**: MD=Mean Difference; CI=Confidence Interval; A positive MD for CVA indicates better postural improvement; negative MD for NDI and VAS indicate greater reduction in disability and pain intensity.
